# Supplementary material for: Removal of Congo Red by magnetic mesoporous titanium dioxide–graphene oxide core–shell microspheres for water purification
Source: Royal Society of Chemistry journal article supplement (doi:10.1039/c3dt53474j), 2014-01-01
Supplement: c3dt53474j1.pdf [file c3dt53474j1.pdf]

**Table S1.** Parameters for Langmuir and Freundlich isotherm model

| T(K) | Langmuir                           |                           |        | Freundlich                                     |        |        |
|------|------------------------------------|---------------------------|--------|------------------------------------------------|--------|--------|
|      | $q_m(\text{mg}\cdot\text{g}^{-1})$ | $K_L(\text{L}/\text{mg})$ | $R^2$  | $K_F(\text{mg}^{1-n}\cdot\text{L}^n/\text{g})$ | $n$    | $R^2$  |
| 303  | 344.8276                           | 0.0019                    | 0.3707 | 0.8775                                         | 1.1176 | 0.9973 |

**Table S2.** Parameters for pseudo-first and second order kinetic models.

| Models              | Rate constant                                               | $q_e$    | $R^2$  |
|---------------------|-------------------------------------------------------------|----------|--------|
| pseudo-first order  | $K_1(\text{min}^{-1})$<br>0.0256                            | 152.0968 | 0.4243 |
| pseudo-second order | $K_2(\text{g}\cdot\text{mg}\cdot\text{min}^{-1})$<br>0.0184 | 51.2821  | 0.995  |

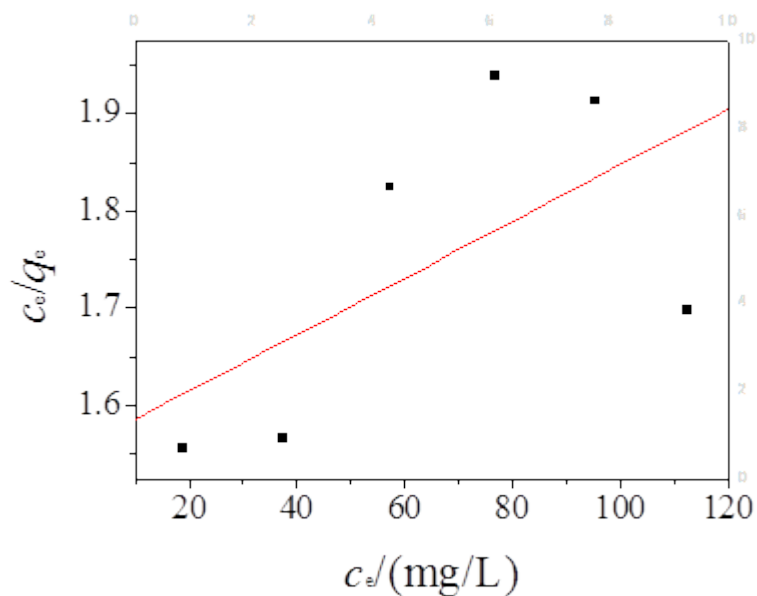

**Fig.S1.** The Langmuir isotherm model.

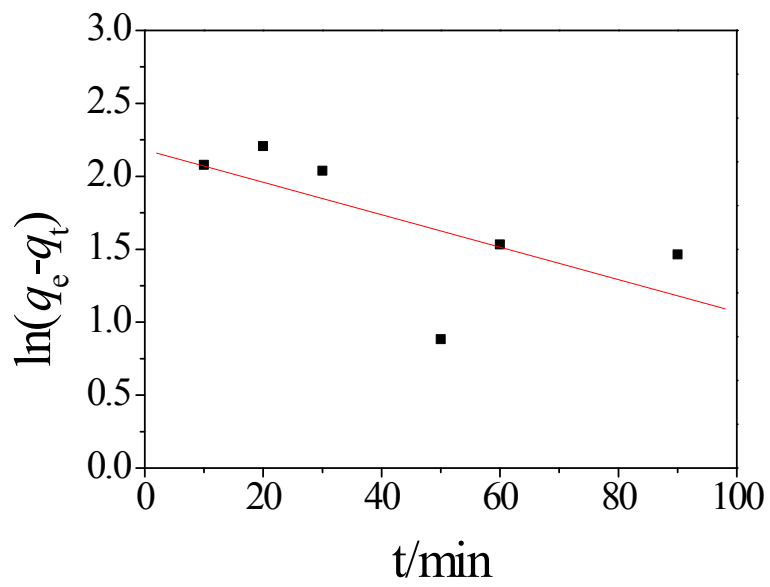

**Fig.S2.** The pseudo-second-order model.
